# Supplementary material for: Interactome analysis of transforming growth factor-β-activated kinase 1 in Helicobacter pylori-infected cells revealed novel regulators tripartite motif 28 and CDC37
Source: PubMed Central journal article supplement (PMC5865676; doi:10.18632/oncotarget.24544), 2018-02-21

# To Figure 1

**A**

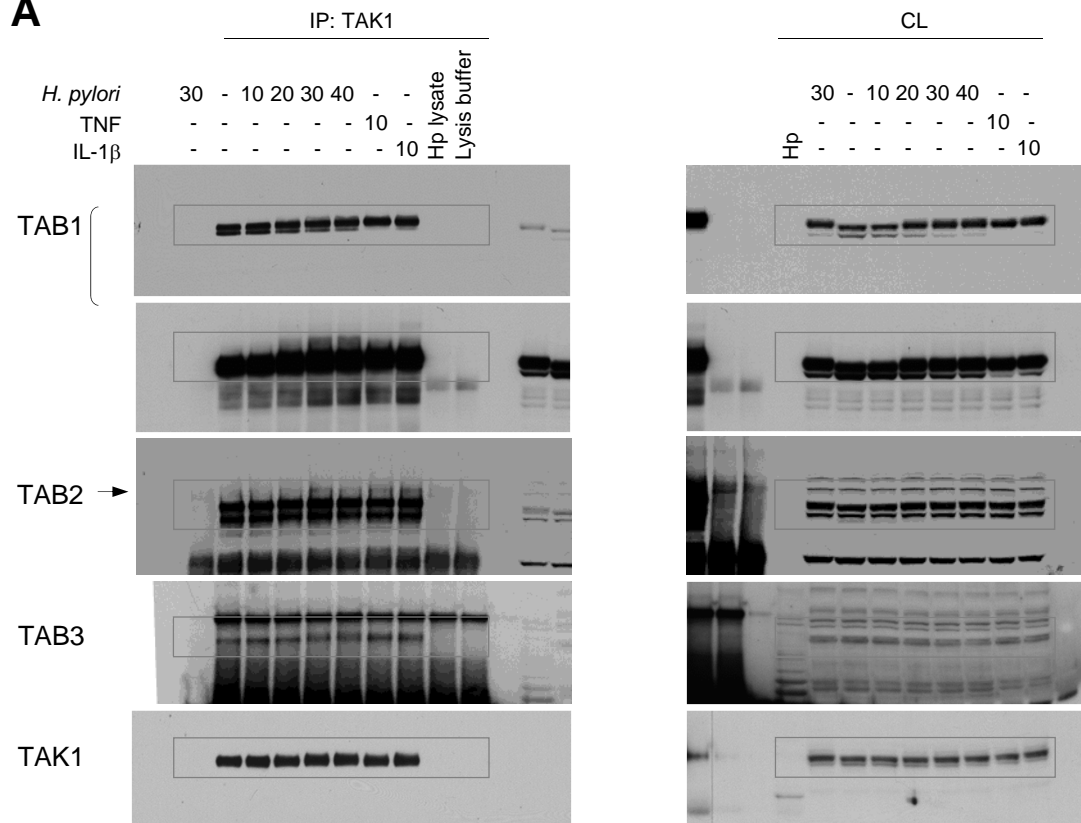

**B**

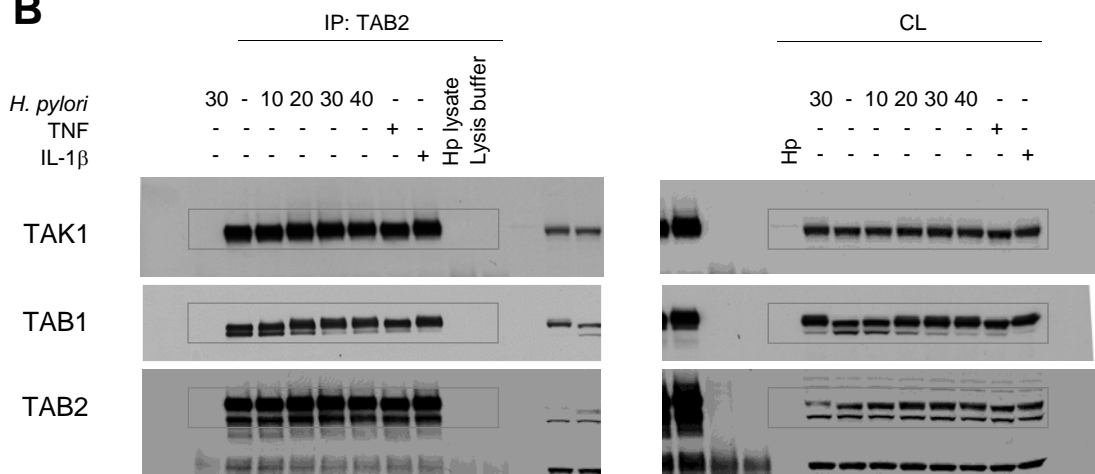

**C**

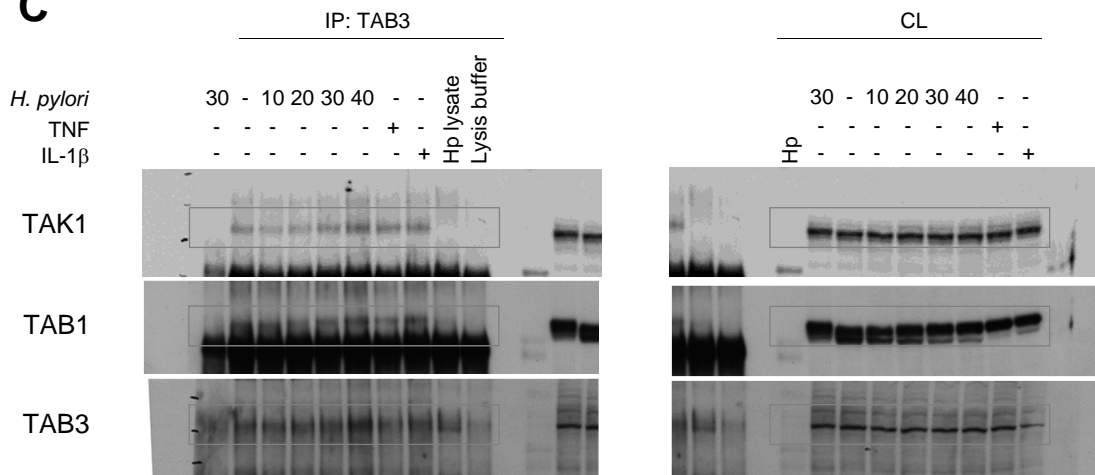

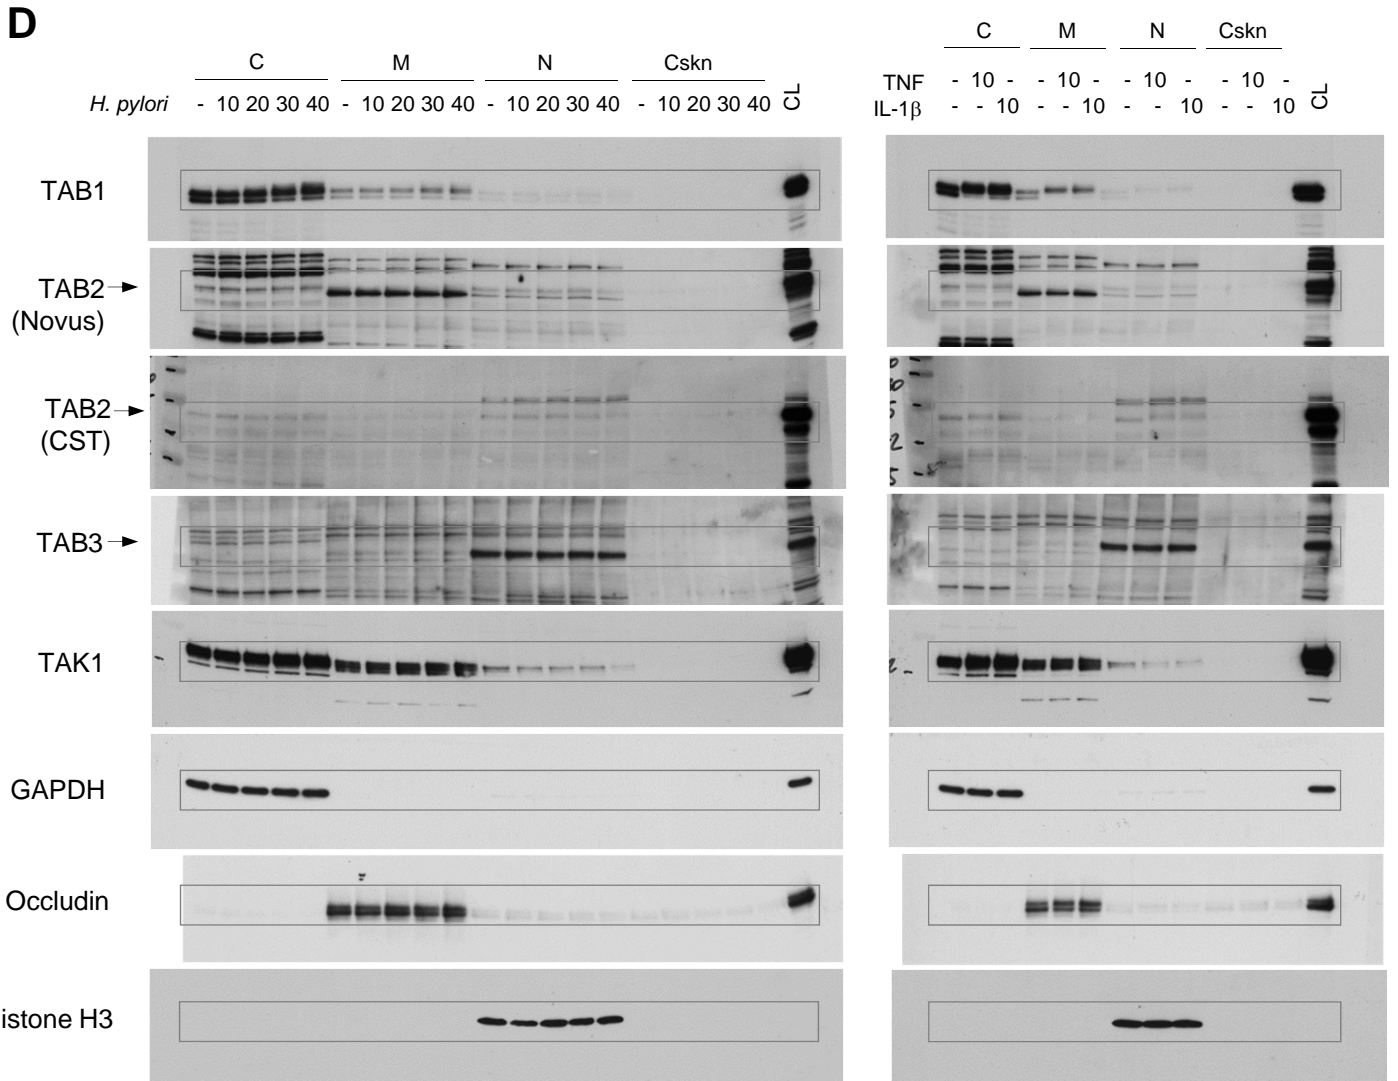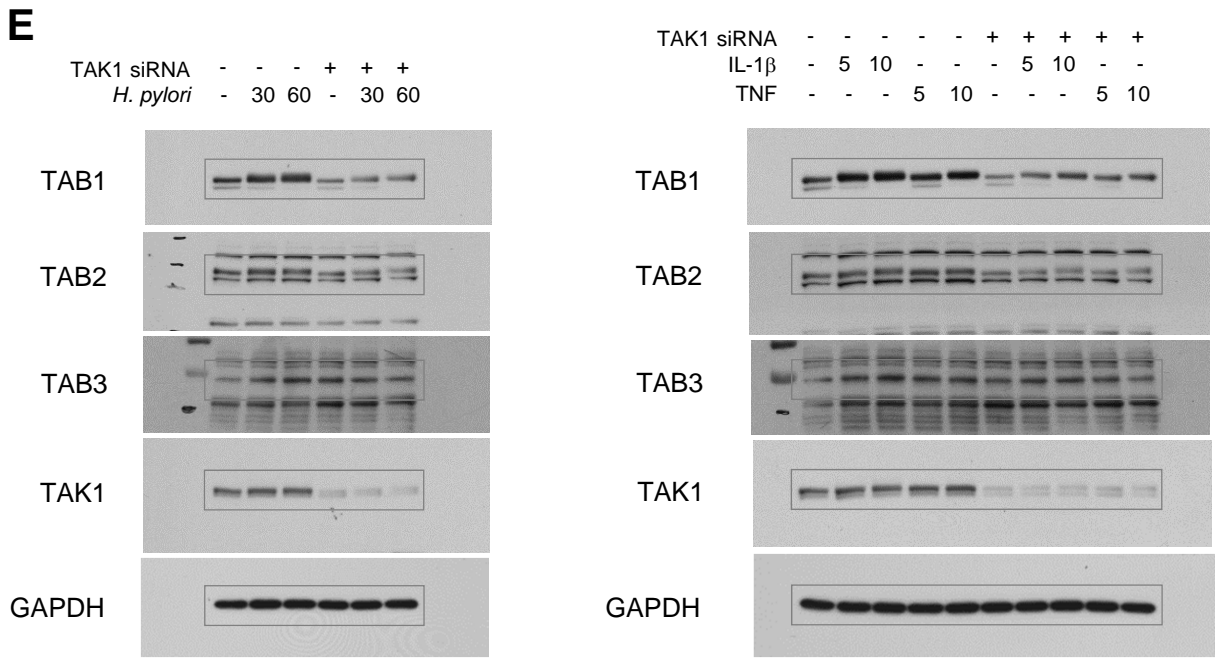

# To Figure 2

## A

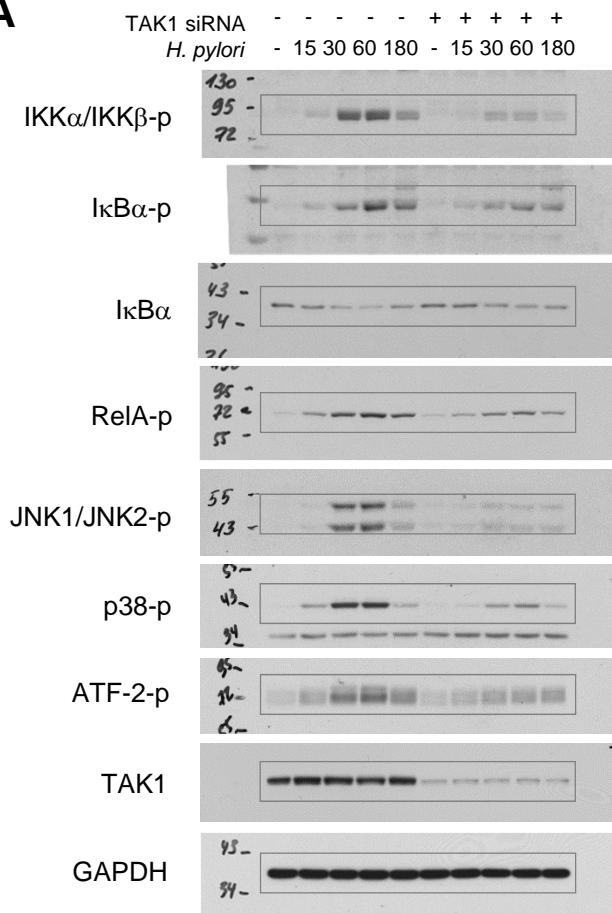

**B**

|                  |   |    |    |    |     |    |   |   |    |    |    |     |    |    |
|------------------|---|----|----|----|-----|----|---|---|----|----|----|-----|----|----|
| TAB1 siRNA       | - | -  | -  | -  | -   | -  | - | + | +  | +  | +  | +   | +  | +  |
| <i>H. pylori</i> | - | 15 | 30 | 60 | 180 | -  | - | - | 15 | 30 | 60 | 180 | -  | -  |
| TNF              | - | -  | -  | -  | 10  | -  | - | - | -  | -  | -  | -   | 10 | -  |
| IL-1 $\beta$     | - | -  | -  | -  | -   | 10 | - | - | -  | -  | -  | -   | -  | 10 |

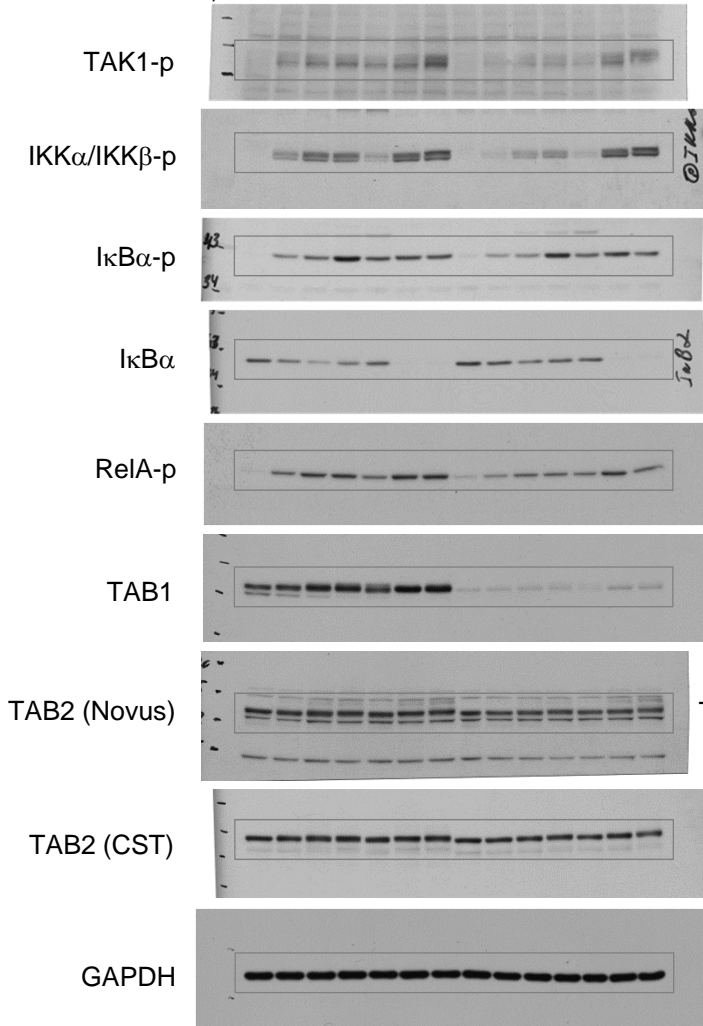**C**

|                  |   |    |    |    |     |    |   |   |    |    |    |     |    |    |
|------------------|---|----|----|----|-----|----|---|---|----|----|----|-----|----|----|
| TAB2 CRISPR      | - | -  | -  | -  | -   | -  | - | + | +  | +  | +  | +   | +  | +  |
| <i>H. pylori</i> | - | 15 | 30 | 60 | 180 | -  | - | - | 15 | 30 | 60 | 180 | -  | -  |
| TNF              | - | -  | -  | -  | 10  | -  | - | - | -  | -  | -  | -   | 10 | -  |
| IL-1 $\beta$     | - | -  | -  | -  | -   | 10 | - | - | -  | -  | -  | -   | -  | 10 |

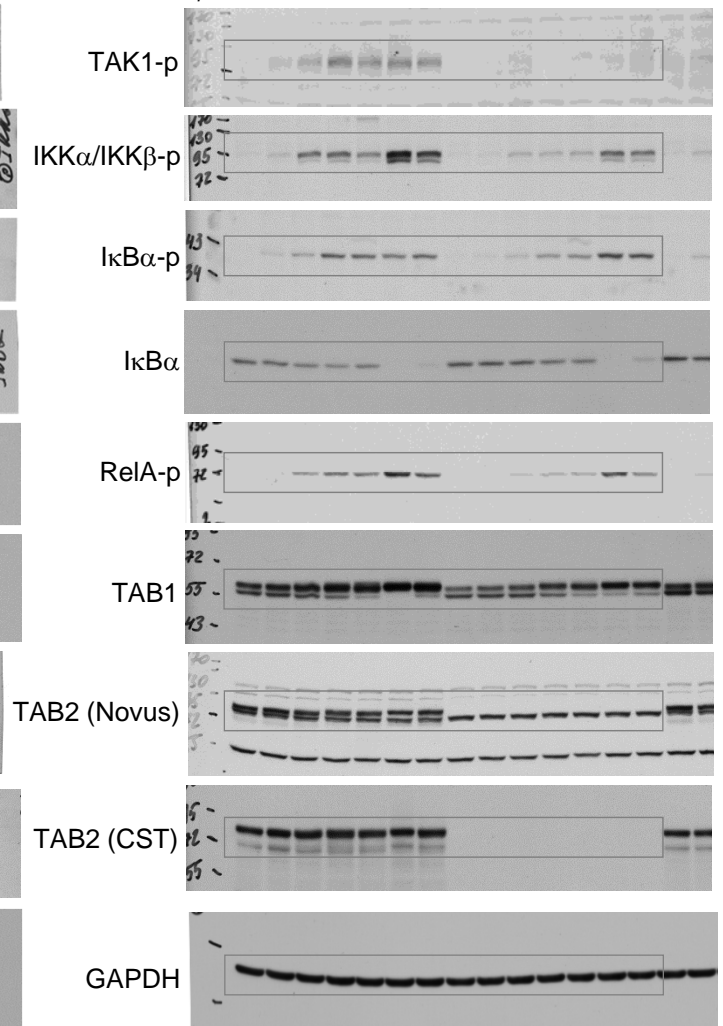

# To Figure 3

## A

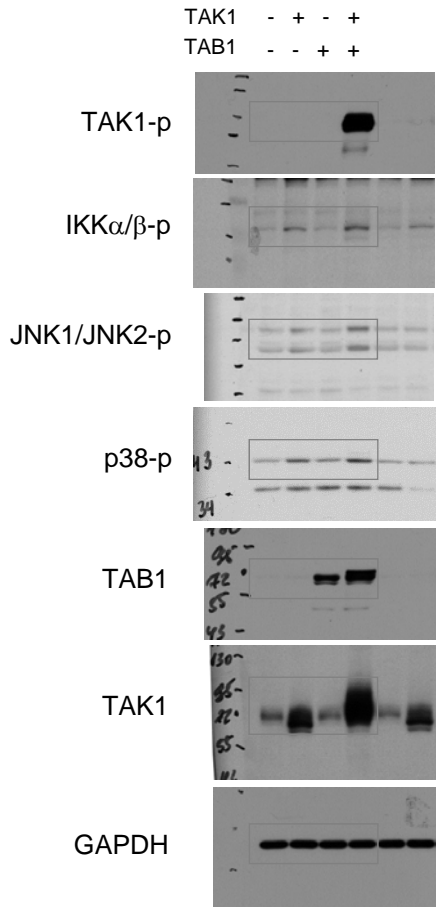

# To Figure 4

**A**

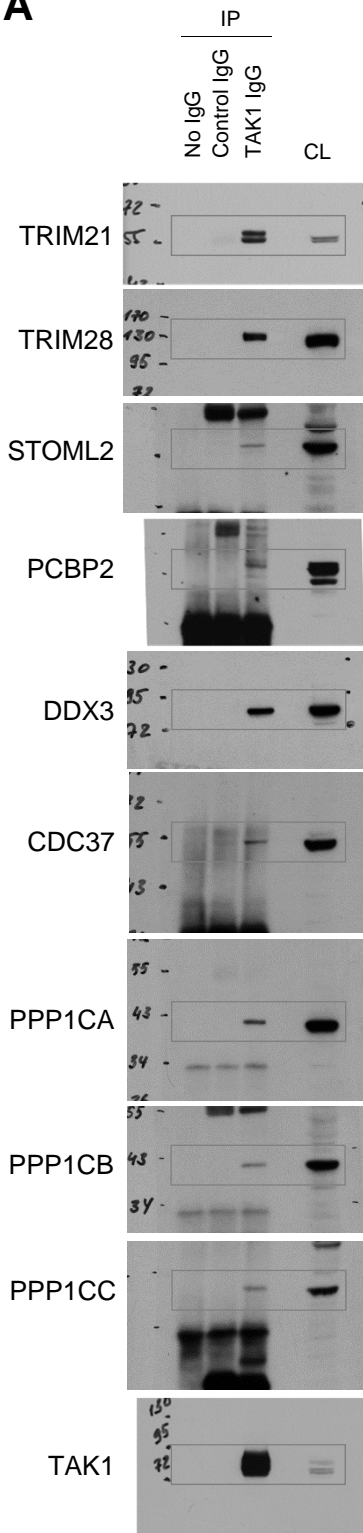

**B**

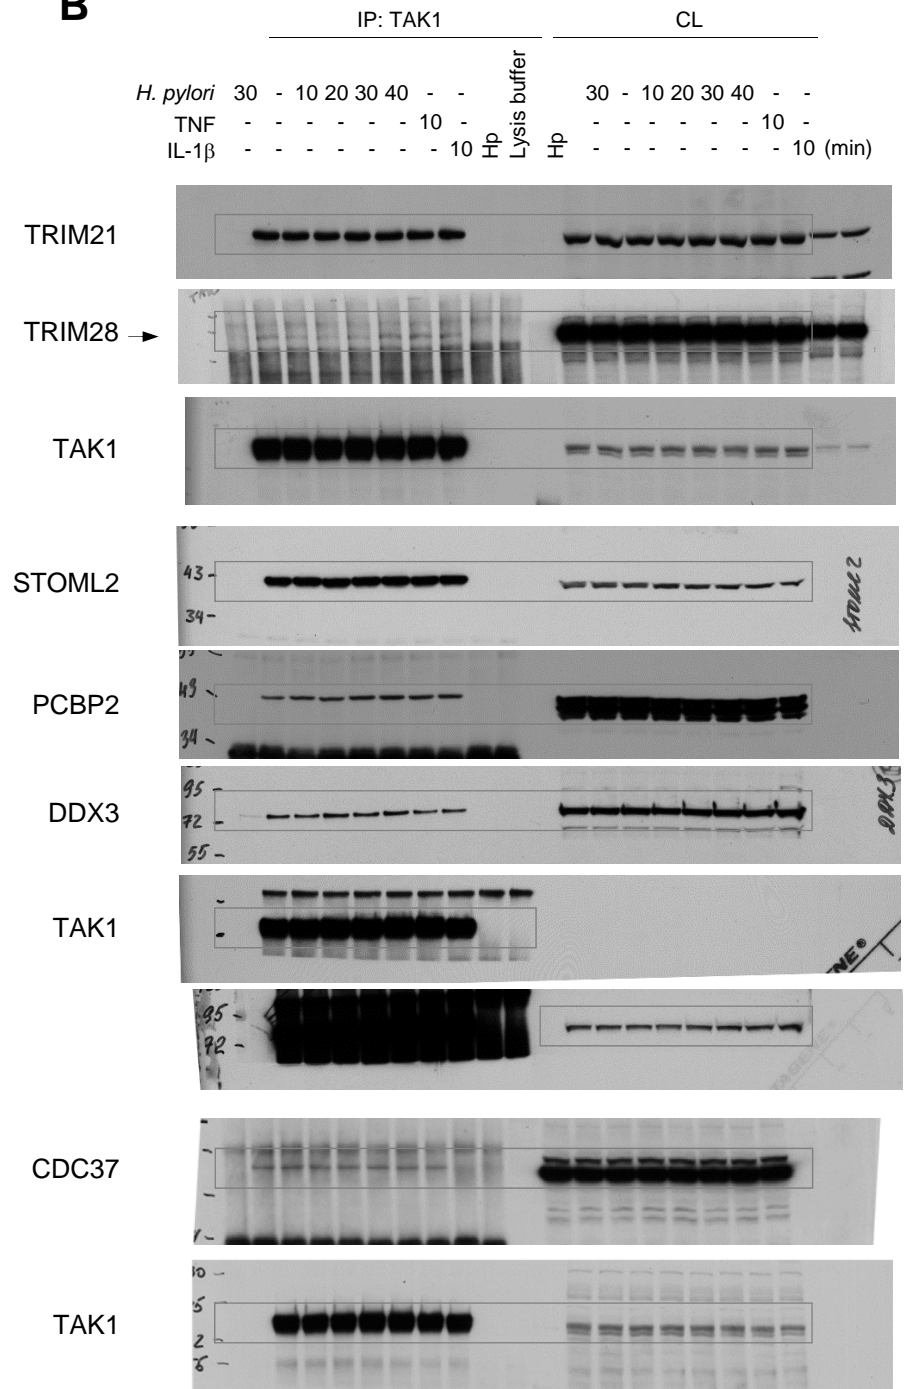

**C**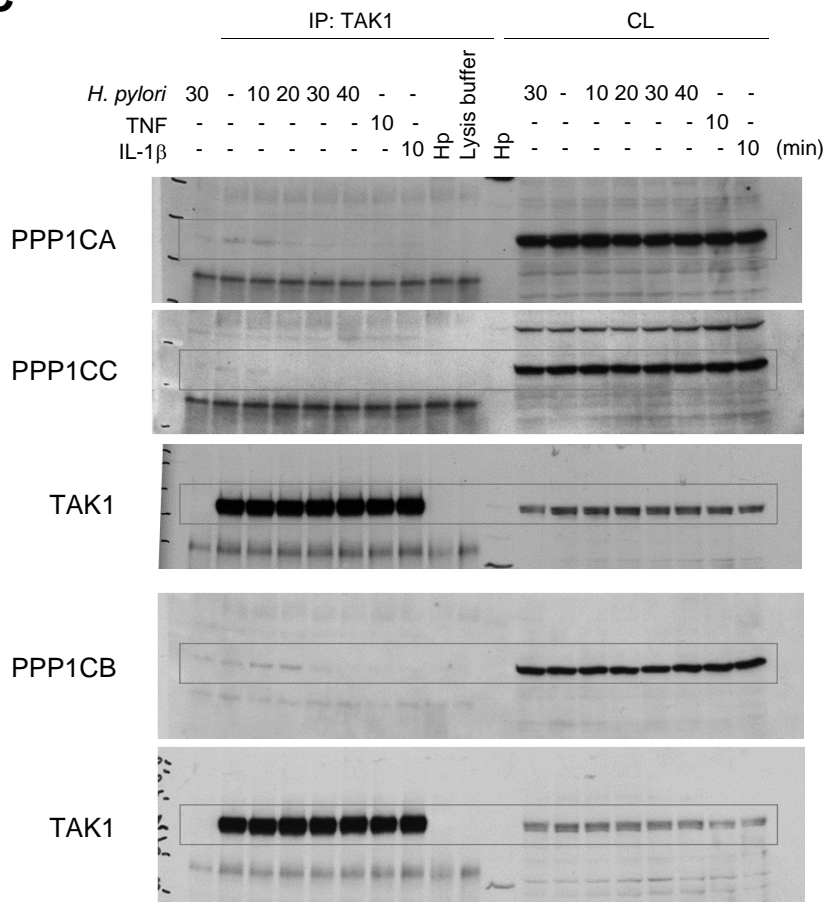

**D**

*H. pylori*

- 0 0.25 0.5 1 3 6 9 (h)

TRIM21

TRIM28

STOML2 →

PCBP2

DDX3

CDC37

GAPDH

PPP1CA

PPP1CB

PPP1CC

GAPDH

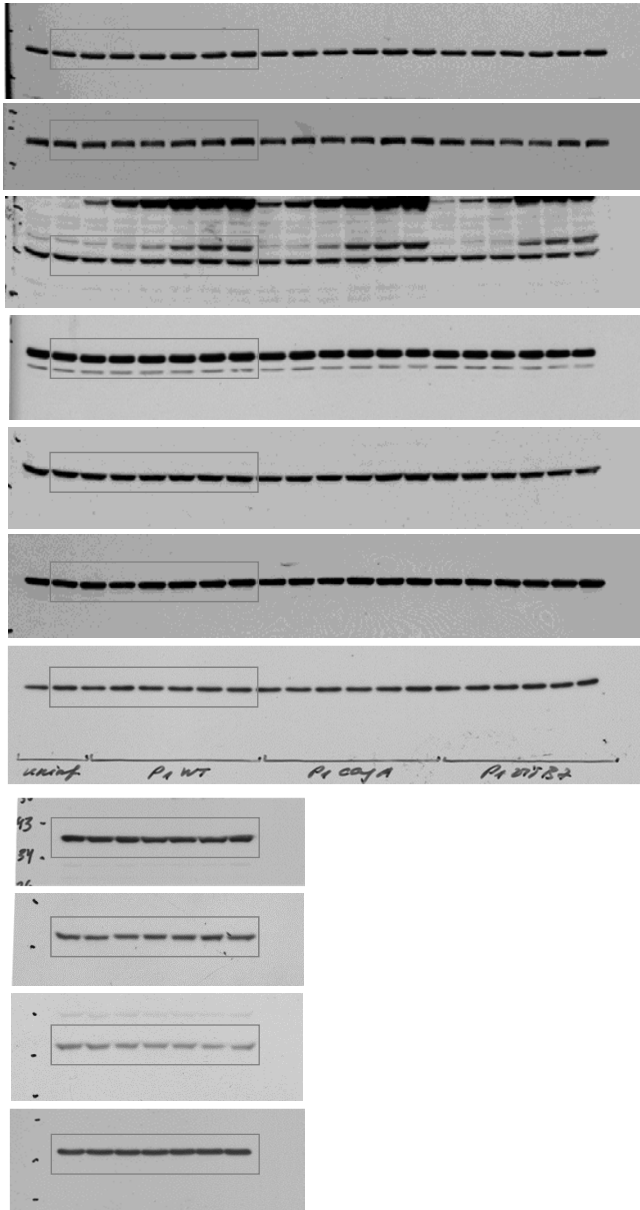



# To Figure 5

## A

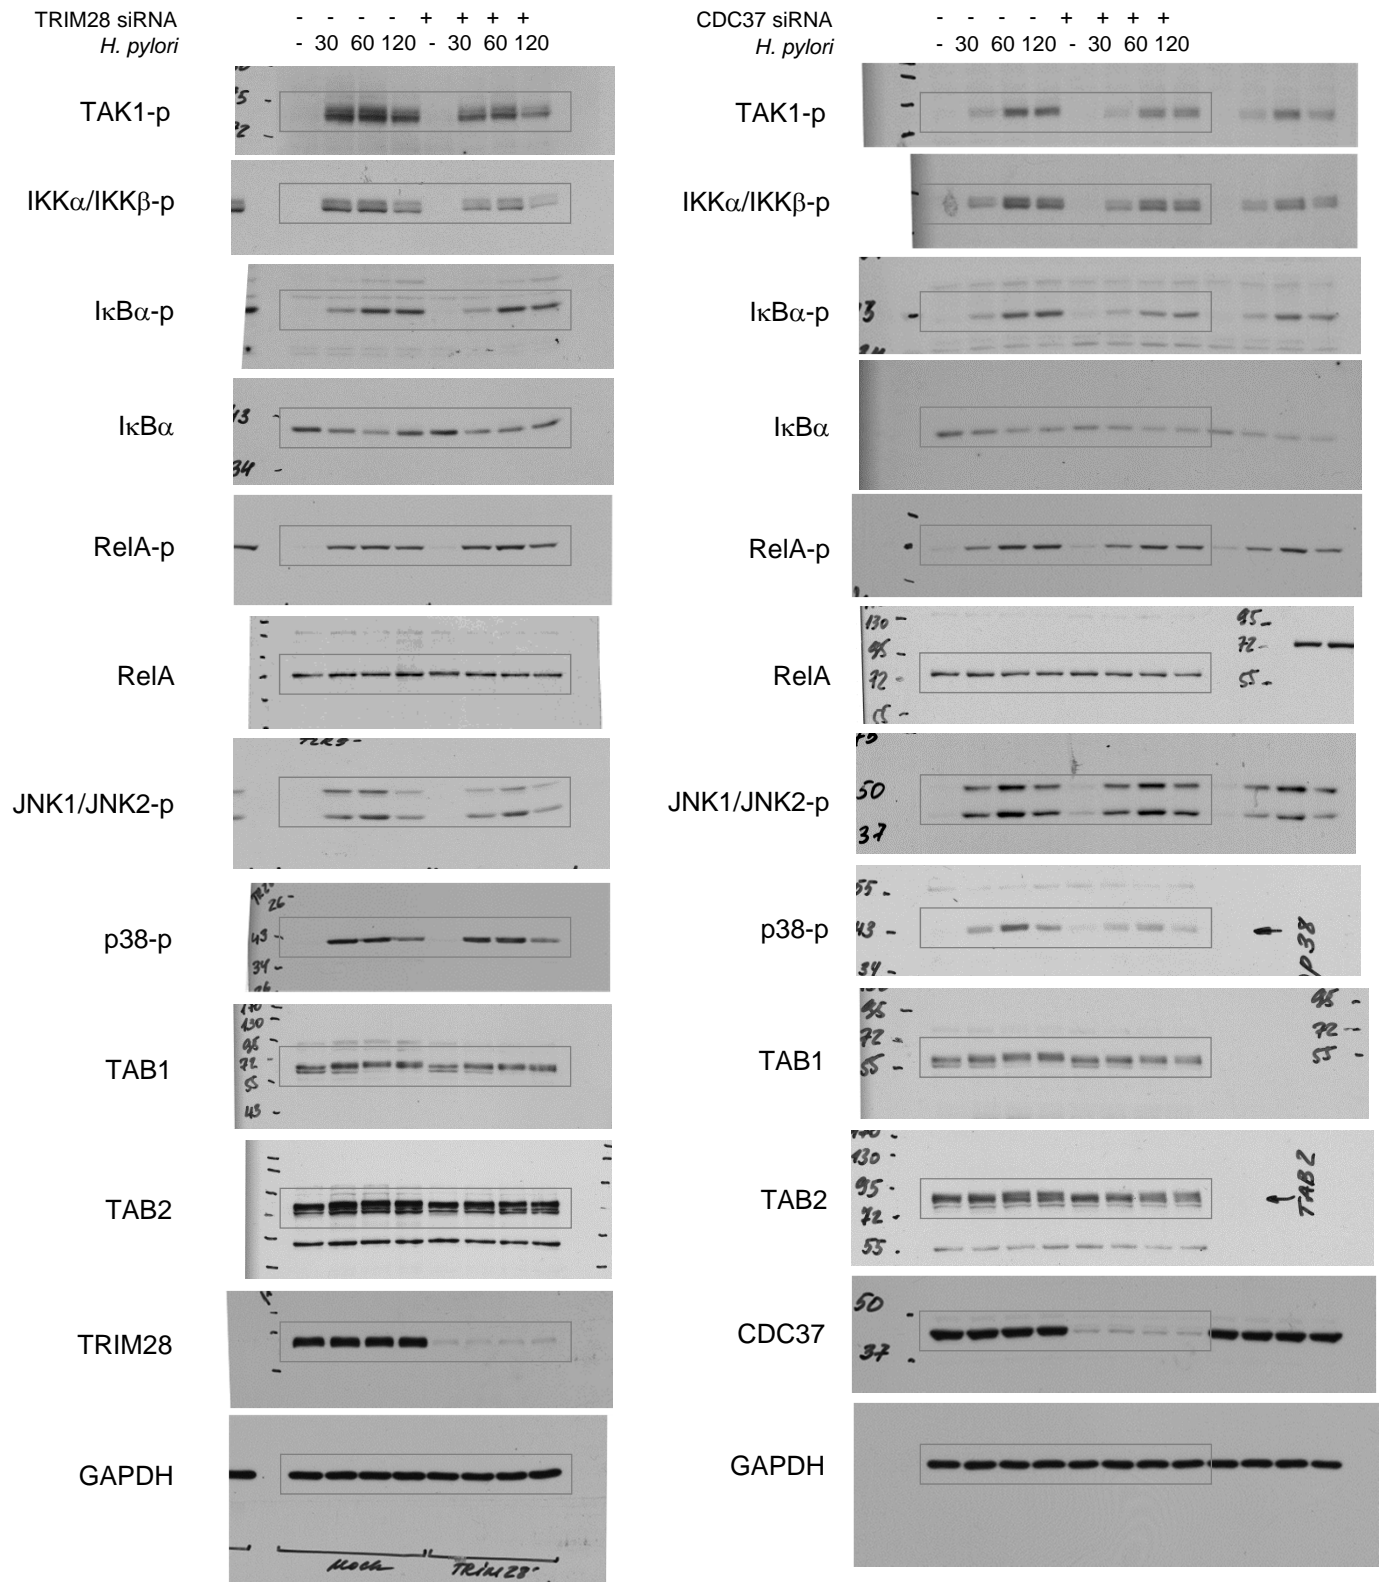

STOML2 siRNA            - - - - + + + +  
*H. pylori*                - 30 60 120 - 30 60 120

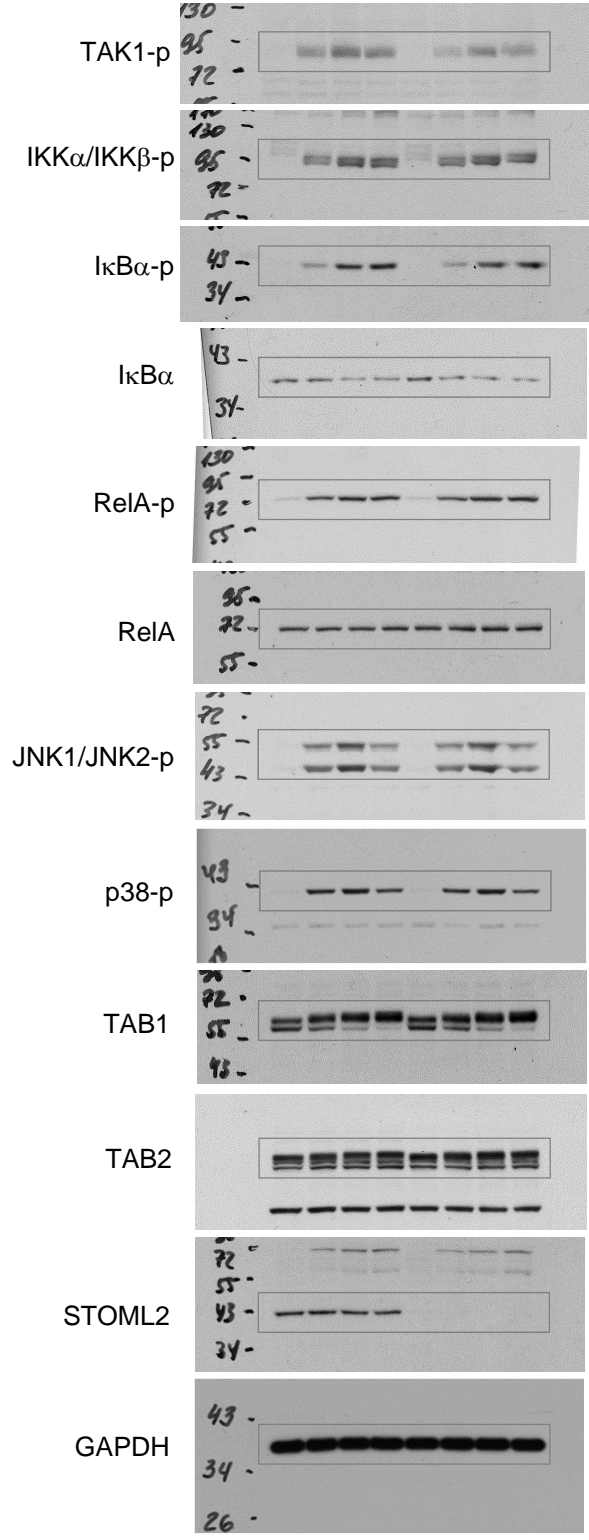

**C**

TRIM28 CRISPR - - - - + + + +  
*H. pylori* - 30 60 120 - 30 60 120

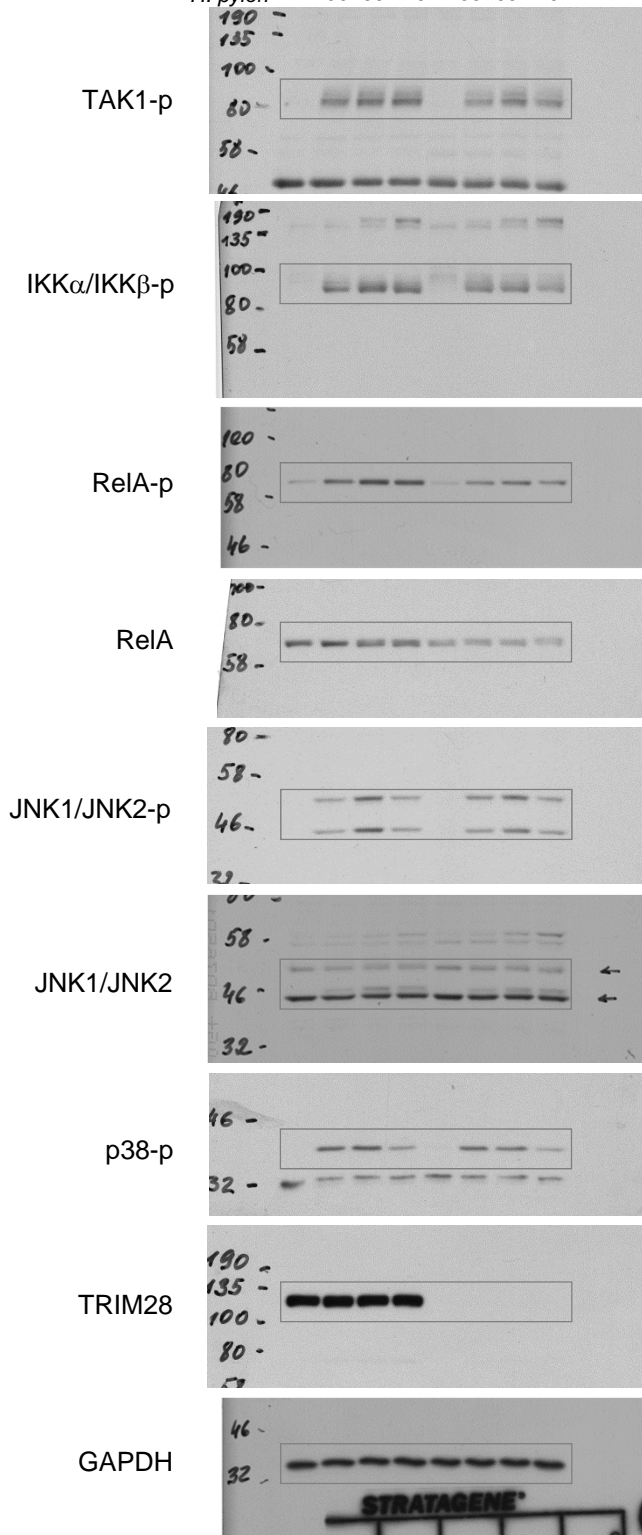

Supplement: oncotarget-09-14366-s002.pdf [file oncotarget-09-14366-s002.pdf]
