# Supplementary material for: Interactome analysis of transforming growth factor-β-activated kinase 1 in Helicobacter pylori-infected cells revealed novel regulators tripartite motif 28 and CDC37
Source: PubMed Central journal article supplement (PMC5865676; doi:10.18632/oncotarget.24544), 2018-02-21
Supplement: oncotarget-09-14366-s001.pdf [file oncotarget-09-14366-s001.pdf]

## Interactome analysis of transforming growth factor- $\beta$ -activated kinase 1 in *Helicobacter pylori*-infected cells revealed novel regulators tripartite motif 28 and CDC37

### SUPPLEMENTARY MATERIALS

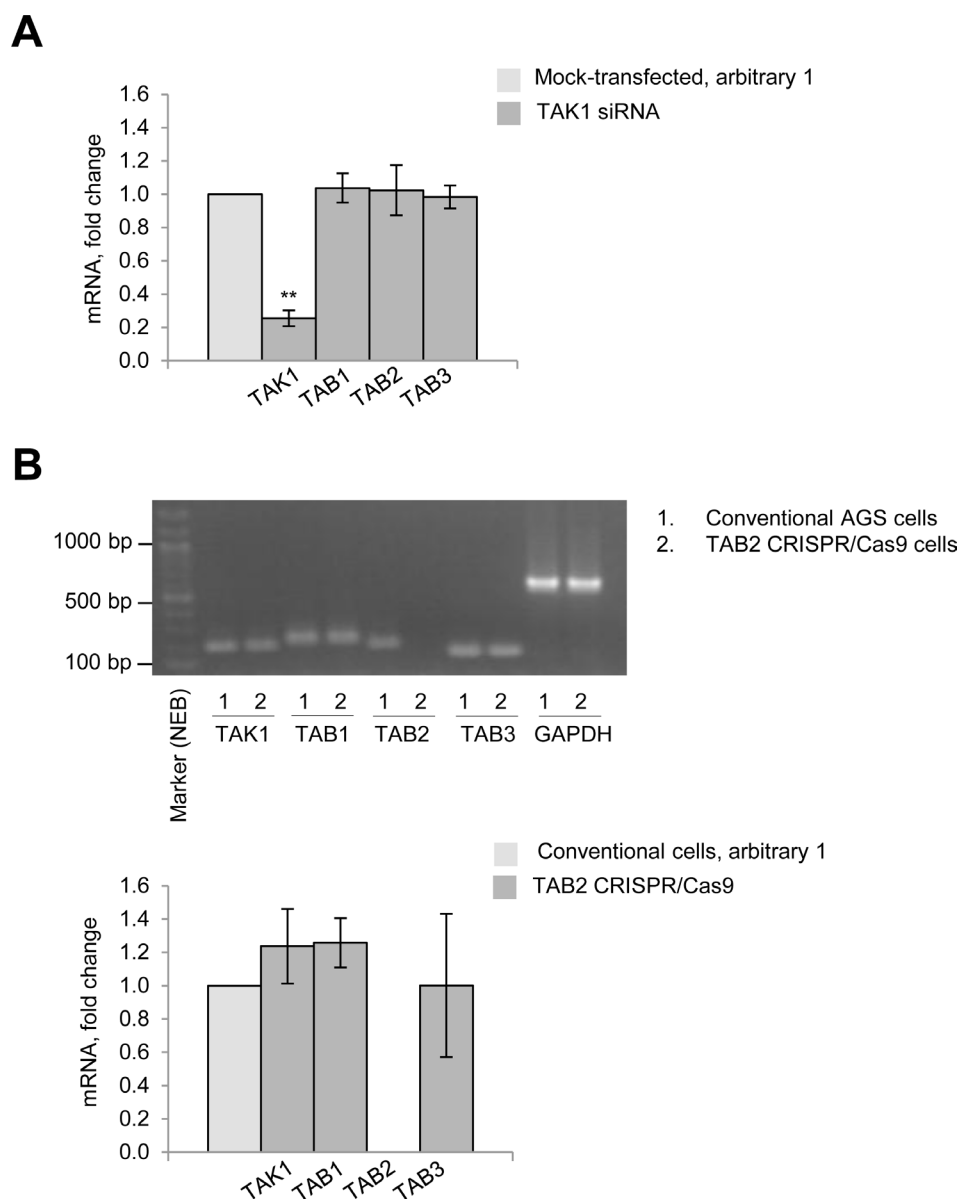

**Supplementary Figure 1:** Depletion of TAK1 (A) and TAB2 (B) does not affect mRNAs of other members of TAK1/TABs complex. Total RNA was isolated from mock- or TAK1 siRNA-transfected cells and from TAB2 CRISPR-Cas9 AGS cell clone, and qRT-PCRs were performed. In addition to described in the Materials and Methods, the following primers (Invitrogen/Thermo Fisher Scientific) were used: 5'-ACAGTGTTCCTCAAGGAGTGG-3' (forward) and 5'-AACTTCAGGTGCCATCCAAG-3' (reverse) for TAK1; 5'-GGATCGGGGATTACAAGGTT-3' (forward) and 5'-GCTTGGCAAATCAGTGTCA-3' (reverse) for TAB1; 5'-TCAACAGCCAAATCAGCAAG-3' (forward) and 5'-TTTCTTTGTGGGGTTCAAG-3' (reverse) for TAB2; 5'-ACAGCAGCAGATCCCTCAGT-3' (forward) and 5'-TGATATGGATGGGGTGGAGT-3' (reverse) for TAB3. \*\* $p < 0.01$  vs mock-transfected cells.

**A**

| Conditions     |                           | TAK1 phosphorylation                 |                                                      |                                                                                      |
|----------------|---------------------------|--------------------------------------|------------------------------------------------------|--------------------------------------------------------------------------------------|
| Overexpression | Stimuli                   | Exp. 1                               | Exp. 2                                               | Exp.3                                                                                |
| mock           | -                         | T415                                 | S389<br>S417<br>S439<br>S455                         |                                                                                      |
| TAK1           | -                         | S389<br>S417<br>S439<br>S455         | S389<br>S417<br>S439<br>S455                         | S389<br>S439<br>T444<br>S455                                                         |
| TAK1           | <i>H. pylori</i> , 20 min | S389<br>S439<br>S455                 | S389<br>S439<br>S455                                 | S389<br>S417<br>S439<br>T444<br>S455                                                 |
| TAK1           | <i>H. pylori</i> , 45 min | S389<br>T415<br>S439<br>T444<br>S455 | S439<br>S455                                         | S389<br>S417<br>S439<br>S455                                                         |
| TAK1, TAB1     | -                         | S375<br>S389<br>S439<br>T444<br>S455 | S361<br>S389<br>T415<br>S439<br>T444<br>S454<br>S455 | S305<br>T344<br>S389<br>T415<br>S439<br>S446<br>S448<br>S454<br>S455<br>T489<br>S492 |
| TAB1           | -                         | S417<br>S439<br>T444<br>S454         | S439<br>S455                                         | S417<br>S439                                                                         |

**B**

| Conditions     |                           | TAK1 acetylation |         |             |
|----------------|---------------------------|------------------|---------|-------------|
| Overexpression | Stimuli                   | Exp. 1           | Exp. 2  | Exp.3       |
| mock           | -                         | no pep.          | no pep. |             |
| TAK1           | -                         | no pep.          | M18     | no pep.     |
| TAK1           | <i>H. pylori</i> , 20 min | no pep.          | S2      | M18         |
| TAK1           | <i>H. pylori</i> , 45 min | no pep.          | Q359    | no pep.     |
| TAK1, TAB1     | -                         | M18              | M18     | M18<br>K547 |
| TAB1           | -                         | no pep.          | no pep. | no pep.     |

**Supplementary Figure 2:** Phosphorylated (**A**) and acetylated (**B**) residues identified with MS in endogenous (“mock” and “TAB1”) and overexpressed TAK1 (“TAK1” and “TAK1, TAB1”).

**A**

| Conditions     |                           | TAB1 phosphorylation |                            |                          | TAB1 HexNAcylation |        |              |
|----------------|---------------------------|----------------------|----------------------------|--------------------------|--------------------|--------|--------------|
| Overexpression | Stimuli                   | Exp. 1               | Exp. 2                     | Exp.3                    | Exp. 1             | Exp. 2 | Exp.3        |
| mock           | -                         | -                    | S7                         |                          | S395               | S396   |              |
| TAK1           | -                         | no pep.              | S11                        | S7                       | S396               | S401   | S401         |
| TAK1           | <i>H. pylori</i> , 20 min | S11                  | S7                         | no pep.                  | S395               | S401   | S401         |
| TAK1           | <i>H. pylori</i> , 45 min | S7                   |                            | -                        | S396               |        | S396         |
| TAK1, TAB1     | -                         | S7                   | S11<br>S16<br>S378<br>S469 | S7<br>S11<br>T18<br>S378 | S395<br>S401       | S401   | S395<br>S401 |
| TAB1           | -                         | S7                   | S7                         | S11                      | S396               | S401   | S401         |

**B**

| Conditions     |                           | TAB2 phosphorylation |              |              | TAB2 acetylation |         |         |
|----------------|---------------------------|----------------------|--------------|--------------|------------------|---------|---------|
| Overexpression | Stimuli                   | Exp. 1               | Exp. 2       | Exp.3        | Exp. 1           | Exp. 2  | Exp.3   |
| mock           | -                         | no pep.              | no pep.      |              | A2               | A2      |         |
| TAK1           | -                         | no pep.              | no pep.      | no pep.      | A2               | A2      | A2      |
| TAK1           | <i>H. pylori</i> , 20 min | T484                 | S477<br>T488 | S482         | A2               | A2      | no pep. |
| TAK1           | <i>H. pylori</i> , 45 min | no pep.              | no pep.      | no pep.      | A2               | A2      | no pep. |
| TAK1, TAB1     | -                         | no pep.              | no pep.      | no pep.      | no pep.          | no pep. | no pep. |
| TAB1           | -                         | no pep.              | no pep.      | S482<br>T660 | A2               | A2      | A2      |

**C**

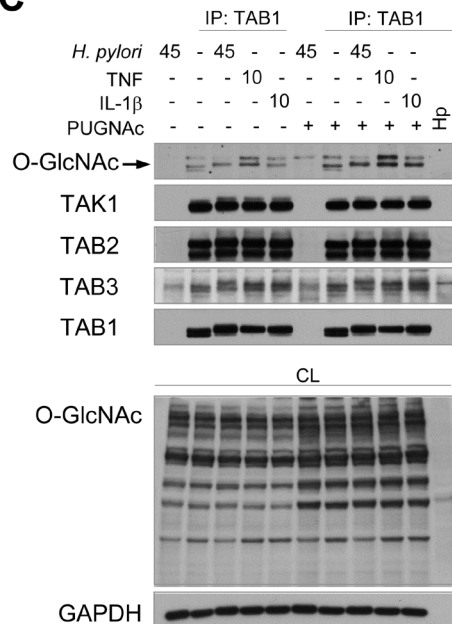

**Supplementary Figure 3:** Phosphorylated, glycosylated and acetylated residues identified with MS in TAB1 (A) and TAB2 (B) co-immunoprecipitated with TAK1. (C) TAB1 is target for glycosylation. AGS cells were left untreated or were incubated with PUGNAc overnight. Next, they were treated with *H. pylori*, TNF or IL-1 $\beta$  for the indicated times (in min), cell lysates (CL) and TAB1 immunoprecipitates (IP) were prepared and analyzed by immunoblotting. *H. pylori* lysate (Hp) was used to demonstrate no cross-reactivity of the antibodies. In some lysates, the immunoprecipitation antibody was not added to approve non-specific protein binding to the beads (lanes 1 and 6). “no pep.”, no peptide with the PTM was detected.

**A**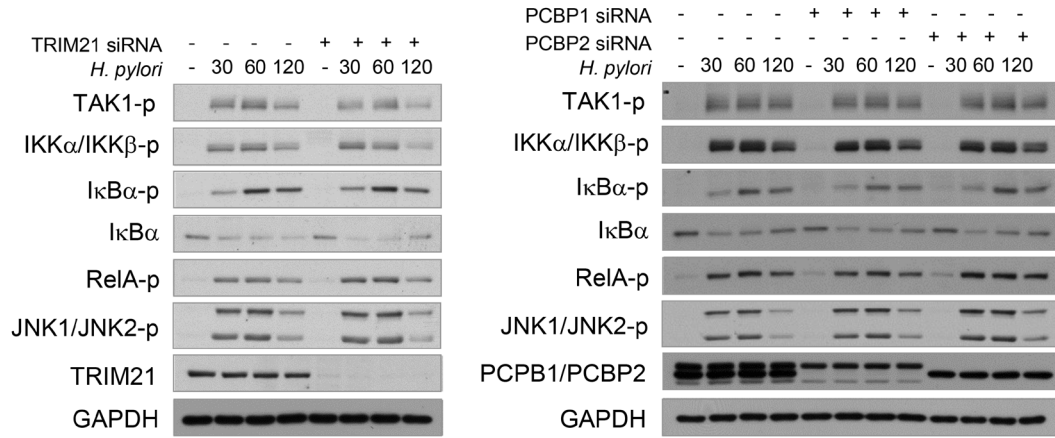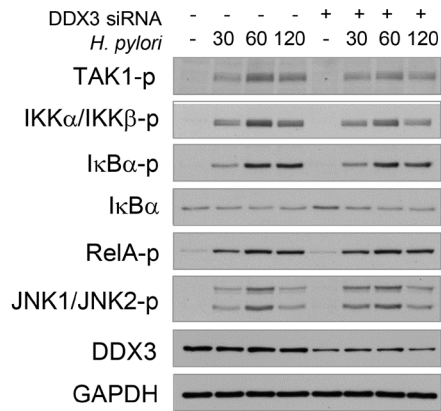**B**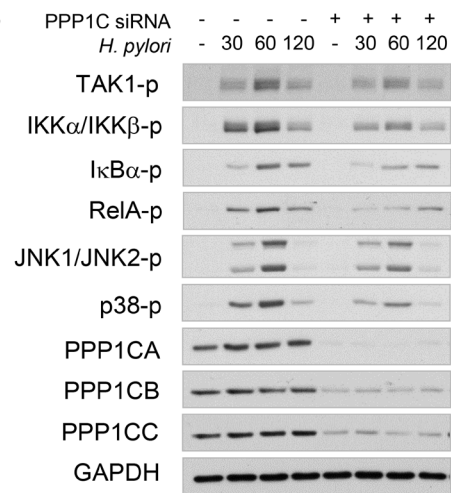

**Supplementary Figure 4:** (A) TRIM21, PCBP1 and DDX3 are not required for NF- $\kappa$ B and MAP kinases activation in *H. pylori*-infected AGS cells. (B) Concomitant depletion of PPP1CA, PPP1CB and PPP1CC leads to decrease in phosphorylation of NF- $\kappa$ B and MAP kinases in *H. pylori*-infected AGS cells. Mock- or specific siRNA-transfected cells were treated with *H. pylori* for the indicated times (in min), cell lysates were prepared and analysed by immunoblotting.

**Supplementary Images: Uncropped immunoblots.** See Supplementary Images

**Supplementary Table 1: Antibodies used for the investigation**

| Name                                                       | Source  | Supplier                                                 | Mr of target, kD                      |
|------------------------------------------------------------|---------|----------------------------------------------------------|---------------------------------------|
| CDC37                                                      | rb      | Bethyl Laboratories Inc./Biomol, Hamburg, Germany        | 50                                    |
| DDX3                                                       | mouse   | Abcam                                                    | 73                                    |
| GAPDH                                                      | mouse   | Millipore, Temecula, CA, USA                             | 36                                    |
| Histone H3                                                 | rb      | Cell Signalling Technology Inc., Danvers, MA, USA        | 17                                    |
| I $\kappa$ B $\alpha$ (44D4)                               | rb      | Cell Signalling Technology Inc., Danvers, MA, USA        | 40                                    |
| JNK1, JNK2                                                 | rb      | Sigma, St. Louis, MO, USA                                | 46, 54                                |
| NF- $\kappa$ B p65                                         | mouse   | BD Biosciences Pharmingen, San Jose, CA, USA             | 65                                    |
| Occludin                                                   | mouse   | BD Biosciences Pharmingen, San Jose, CA, USA             | 65                                    |
| PCBP2                                                      | rb      | LCBio/ Biozol, Eching, Germany                           | 37, 5 (PCBP1), 38, 6 (PCBP2)          |
| Phospho-ATF-2 (Thr71)                                      | rb      | Cell Signalling Technology Inc., Danvers, MA, USA        | 70                                    |
| Phospho-I $\kappa$ B $\alpha$ (Ser32/36) (5A5)             | mouse   | Cell Signalling Technology Inc., Danvers, MA, USA        | 40                                    |
| Phospho-IKK $\alpha$ / $\beta$ (Ser176/177) (C84E11)       | rb      | Cell Signalling Technology Inc., Danvers, MA, USA        | 85 (IKK $\alpha$ ), 87 (IKK $\beta$ ) |
| Phospho-NF- $\kappa$ B p65 (Ser536)                        | rb      | Cell Signalling Technology Inc., Danvers, MA, USA        | 65                                    |
| Phospho-p38 (Thr180/Tyr182)                                | mouse   | Sigma, St. Louis, MO, USA                                | 38                                    |
| Phospho-SAPK/JNK (T183/Y185)                               | rb mono | Cell Signalling Technology Inc., Danvers, MA, USA        | 46, 54                                |
| Phospho-TAK1 (Thr184/187)                                  | rb      | Cell Signalling Technology Inc., Danvers, MA, USA        | 78 to 82                              |
| PPP1CA                                                     | rb      | Bethyl Laboratories Inc./Biomol, Hamburg, Germany        | 37                                    |
| PPP1CB                                                     | rb      | Bethyl Laboratories Inc./Biomol, Hamburg, Germany        | 37                                    |
| PPP1CC                                                     | rb      | Bethyl Laboratories Inc./Biomol, Hamburg, Germany        | 37                                    |
| STOML2 (siRNA depletion experiments)                       | rb      | Abgent, San Diego, CA, USA/Biomol GmbH, Hamburg, Germany | 38,5                                  |
| STOML2 (co-precipated with TAK1)                           | rb      | LCBio/ Biozol, Eching, Germany                           | 38,5                                  |
| TAK1 (D94D7) (for IP), against residues surrounding Gln600 | rb mono | Cell Signalling Technology Inc., Danvers, MA, USA        | 78 to 82                              |
| TAK1 (for WB)                                              | rb      | Cell Signalling Technology Inc., Danvers, MA, USA        | 78 to 82                              |
| TAB1 (C25E9)                                               | rb      | Cell Signalling Technology Inc., Danvers, MA, USA        | 60                                    |
| TAB2, against region between residues 500 and 550          | rb      | Novus Biologicals, Abingdon, United Kingdom              | 76 to 80                              |
| TAB2 (C88H10), against residues surrounding Leu330         | rb mono | Cell Signalling Technology Inc., Danvers, MA, USA        | 76 to 80                              |
| TAB3                                                       | rb      | Acris GmbH, Herford, Germany                             | 79 to 83                              |
| TRIM21 (SSA1)                                              | rb      | Bethyl Laboratories Inc./Biomol, Hamburg, Germany        | 50                                    |
| TRIM28 (KAP-1)                                             | rb      | Bethyl Laboratories Inc./Biomol, Hamburg, Germany        | 100                                   |
